# Supplementary material for: CD40L Priming of Platelets via NF‐κB Activation is CD40‐ and TAK1‐Dependent
Source: PubMed Central journal article supplement — J Am Heart Assoc. 2018 Nov 22;7(23):e03677. doi: 10.1161/JAHA.118.009636 (PMC6405550; doi:10.1161/jaha.118.009636), 2018-11-22
Supplement: JAH3-7-0e03677-s001.pdf [file JAH3-7-0e03677-s001.pdf]

**SUPPLEMENTAL  
MATERIAL**

— 0,0125 U/mL — 0,025 U/mL — 0,05 U/mL — 0,1 U/mL

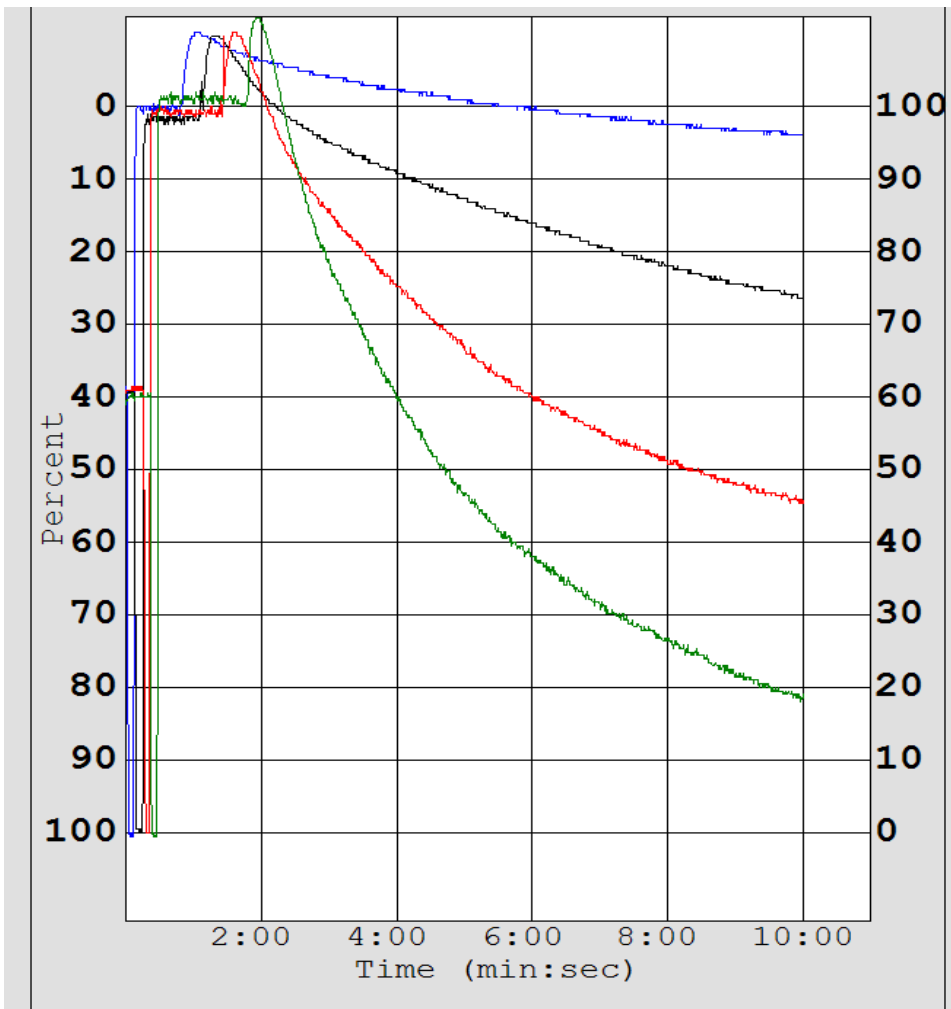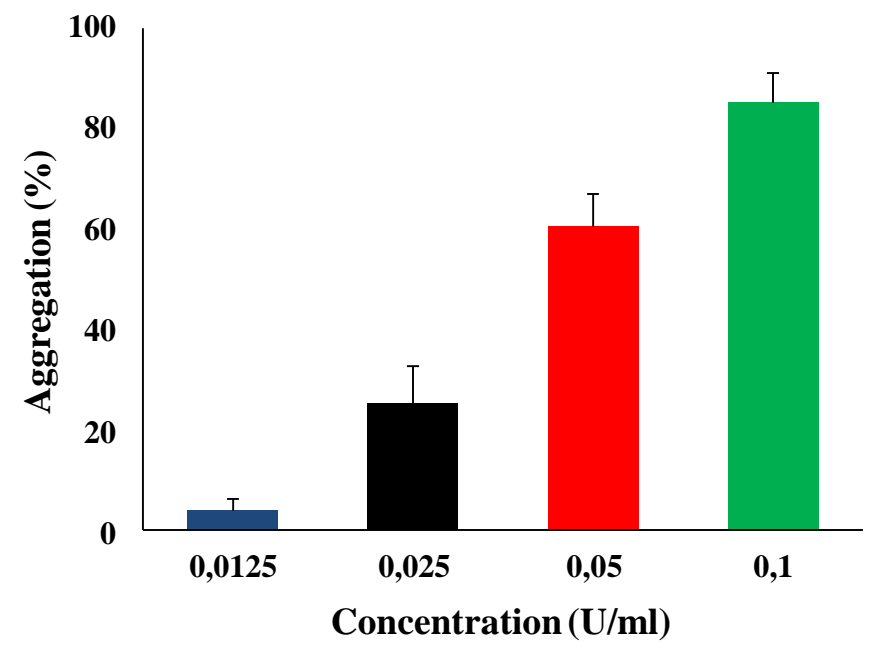

**Figure S1. Dose-response curve of platelet aggregation in response to thrombin.** Washed human platelets ( $250 \times 10^6/\text{mL}$ ) were stimulated with four doses of thrombin : 0,0125 U/mL, 0,025 U/mL, 0,05 U/mL and 0,1 U/mL. (n = 25, mean  $\pm$  SEM).

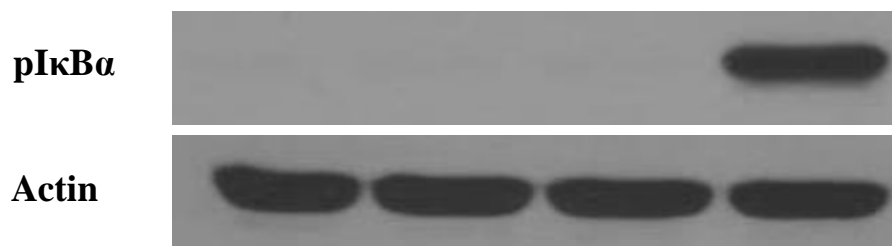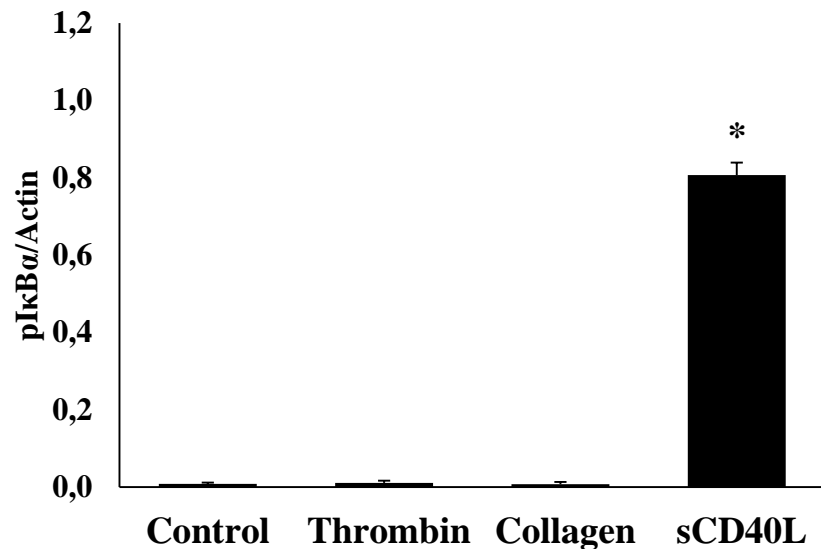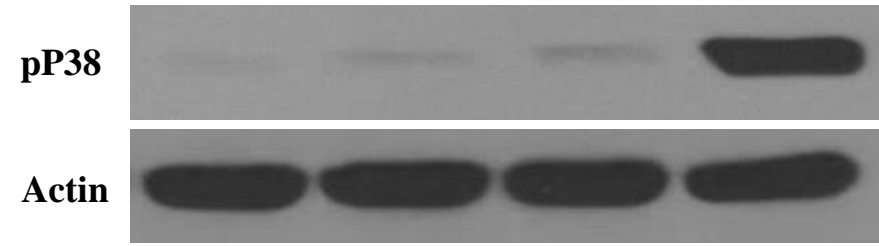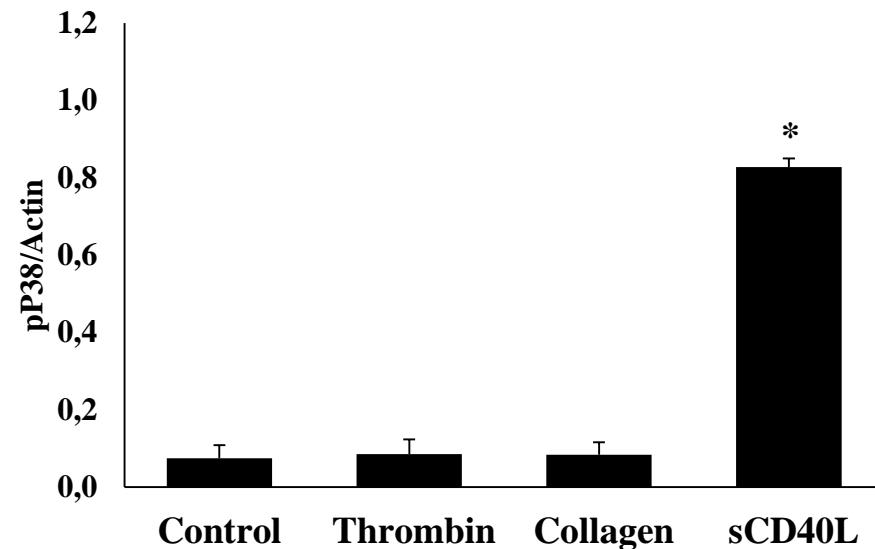

**Figure S2. Comparison of the action of sCD40L vs. suboptimal concentrations of thrombin or collagen on platelet NF- $\kappa$ B and p38 MAPK activation.** Washed human platelets ( $1,000 \times 10^6/\text{mL}$ ) were stimulated with thrombin ( $0.025 \text{ U}/\text{mL}$ ), collagen ( $0.25 \text{ ug}/\text{mL}$ ) or sCD40L ( $1,000 \text{ ng}/\text{mL}$ ) for 5 minutes. Platelet lysates were resolved in 10% SDS-PAGE and assessed for (A) pI $\kappa$ B $\alpha$ . and (B) pP38 blot. Actin blot is from stripped membranes of pI $\kappa$ B $\alpha$  and pP38 blots. Blots are representative of four independent experiments, expressed in optical density ( $n = 4$ , mean  $\pm$  SEM). \* $p < 0.001$  (one-way ANOVA followed by Dunnett's multiple comparisons test vs. control).

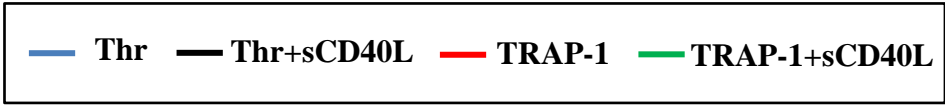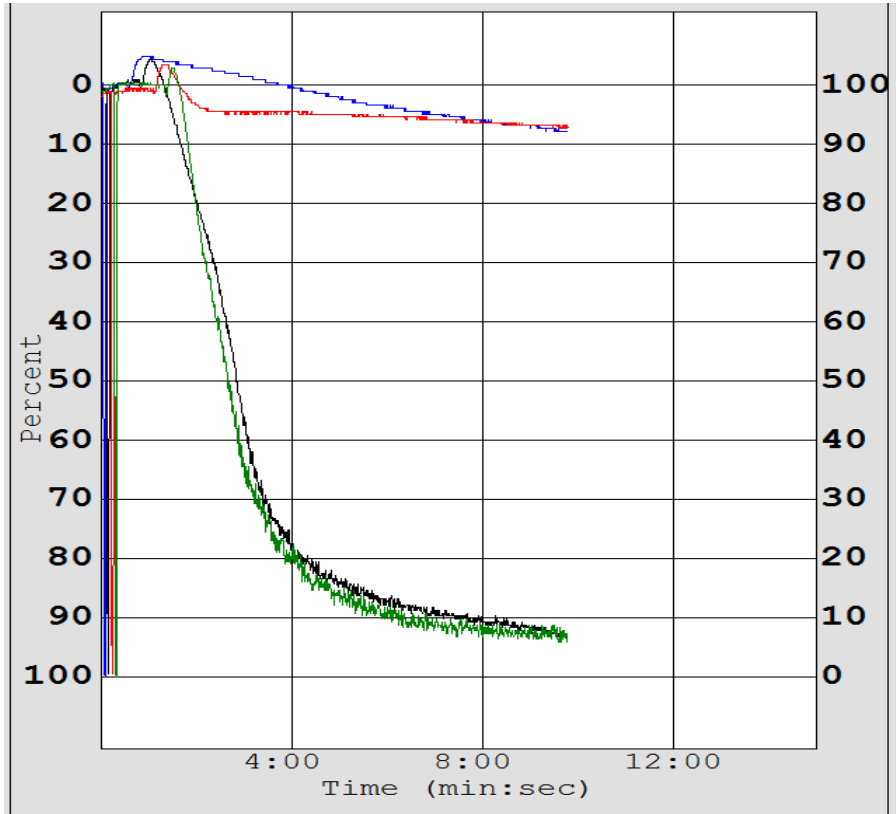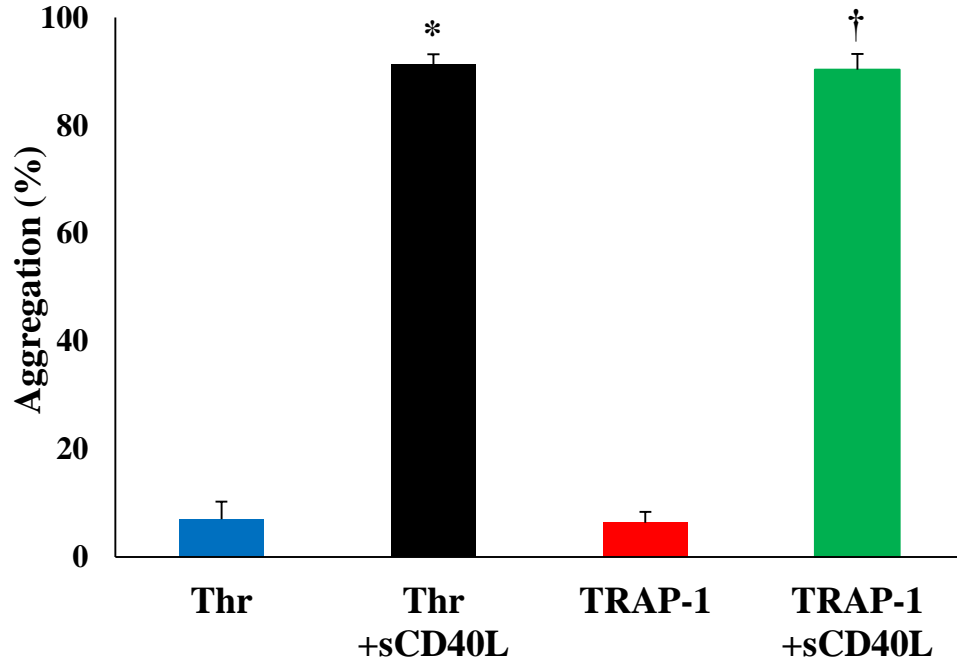

**Figure S3. Comparison of the effects of sCD40L on platelet aggregation in response to suboptimal dose of thrombin or TRAP-1.** Washed human platelets ( $250 \times 10^6/\text{mL}$ ) were treated or not with sCD40L (1,000 ng/mL) for 30 minutes at 37°C. Platelet aggregation was induced by a suboptimal dose of thrombin ( $0.025 \pm 0.01 \text{ U/mL}$ ) or TRAP-1 ( $1 \pm 0.5 \text{ uM}$ ). Histograms represent means of aggregation ( $n = 3$ , mean  $\pm$  SEM). \* $p < 0.001$  vs Thr, † $p < 0.001$  vs TRAP-1 (one-way ANOVA followed by Dunnett's multiple comparisons test vs. the control groups).

A

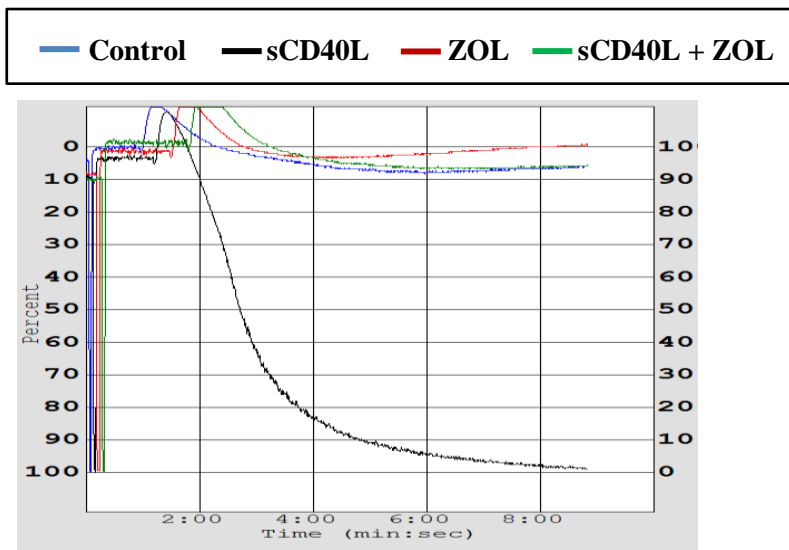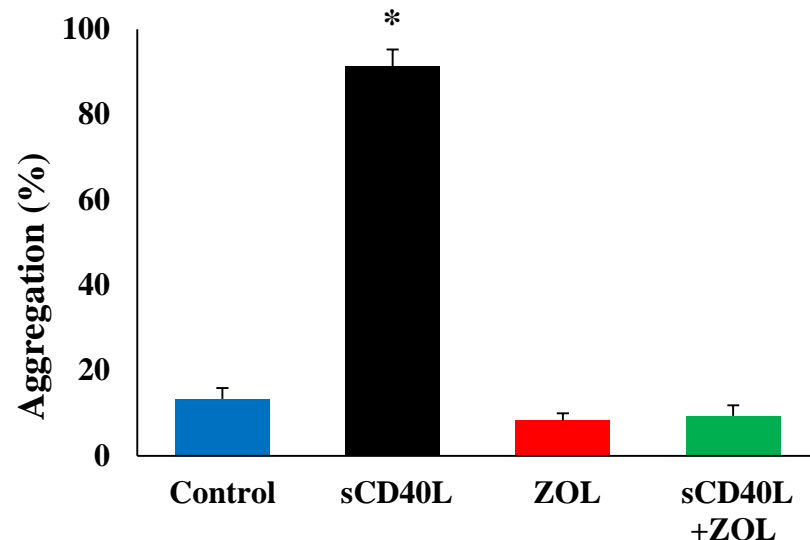

B

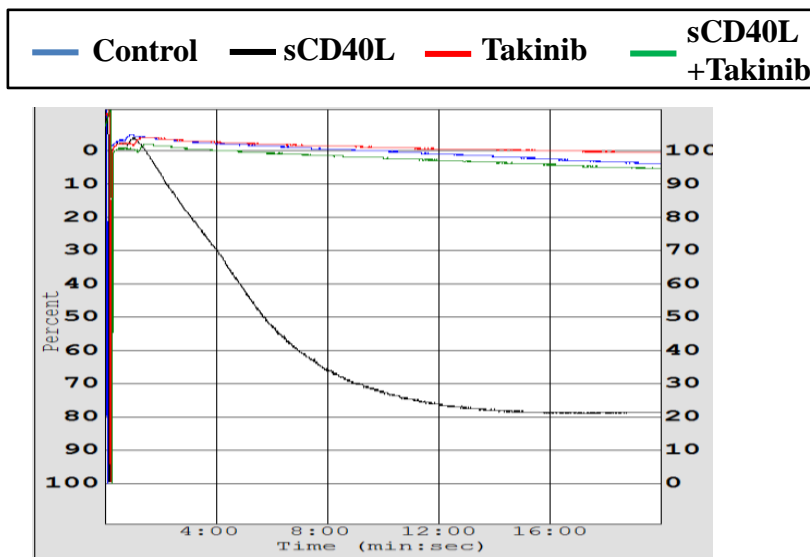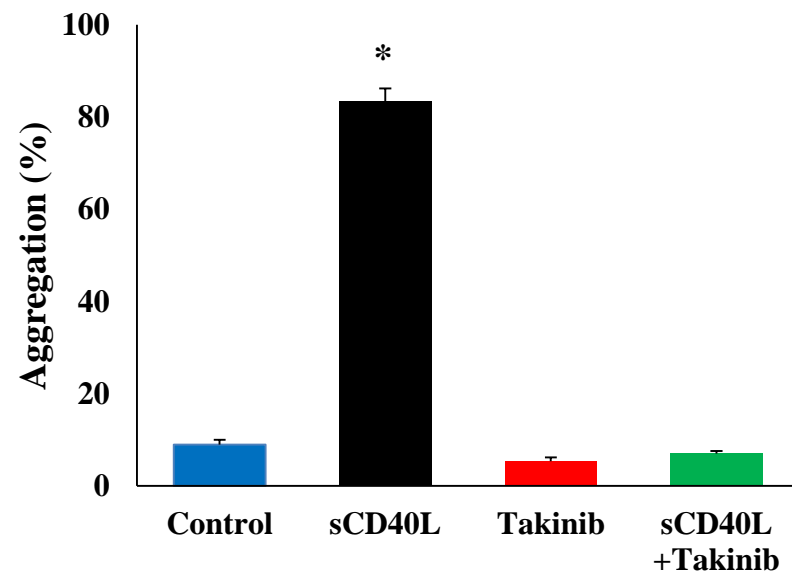

**Figure S4. ZOL and Takinib have no effect on platelet aggregation in the absence of sCD40L.** Washed human platelets ( $250 \times 10^6/\text{mL}$ ) were pre-treated with (A) 100 nM ZOL or (B) 10  $\mu\text{M}$  Takinib for 5 minutes and then stimulated with sCD40L (1,000 ng/mL) for 30 minutes at 37°C. Platelet aggregation was induced by a suboptimal dose of thrombin ( $0.025 \pm 0.01$  U/mL) in the presence or absence of sCD40L. Histograms represent means of aggregation ( $n = 4$ , mean  $\pm$  SEM). \* $p < 0.001$ , (one-way ANOVA followed by Dunnett's multiple comparisons test vs. the control group).
